# Supplementary material
Source: publisher site journal article supplement (https://www.dovepress.com/article/326029)
Supplement: Supplementary file 1 [file get_supplementary_file.php]

**Table S1. Composition of HDC per capsule**

| **Chinese name** | **Latin name** | **Family** | **Weight(g)** |
| --- | --- | --- | --- |
| Hu Zhang | *Reynoutria japonica Houtt* | Polygonaceae | 0.525 |
| Di Yu | *Sanguisorba officinalis* L. | Rosaceae | 0.105 |
| Zhu Sha Qi | *[Polygonum](http://www.theplantlist.org/tpl1.1/record/kew-2574723)*  *[ciliinerve](http://www.theplantlist.org/tpl1.1/record/kew-2574723)*[(Nakai) Ohwi](http://www.theplantlist.org/tpl1.1/record/kew-2574723) | Angiospermiaceae | 0.525 |
| Bai Ji | *Bletilla striata* (Thunb.) Rchb.f. | Orchidaceae | 0.420 |
| Bai hua she she cao | *Oldenlandia diffusa* (Willd.) Roxb. | Rubiaceae | 0.105 |
| Bei bai jiang | *Sonchus arvensis* L | Compositae | 0.105 |
| Gan Cao | *Glycyrrhiza uralensis Fisch.* | Leguminosae | 0.350 |
| Er Se Bu Xue Cao | *Limonium bicolor* (Bunge) Kuntze | Plumbaginaceae | 0.105 |

**Table S2 Information of 10 chemical components and corresponding targets of HDC**

| **Mol ID** | **Molecule name** | **OB(%)** | **DL** | **Target number** |
| --- | --- | --- | --- | --- |
| MOL000098 | quercetin | 46.43 | 0.28 | 157 |
| MOL000422 | kaempferol | 41.88 | 0.24 | 68 |
| MOL000006 | luteolin | 36.16 | 0.25 | 57 |
| MOL000358 | beta-sitosterol | 36.91 | 0.75 | 45 |
| MOL003896 | isoflavone | 42.56 | 0.2 | 41 |
| MOL004328 | naringenin | 59.29 | 0.21 | 36 |
| MOL000392 | formononetin | 69.67 | 0.21 | 36 |
| MOL000354 | isorhamnetin | 49.6 | 0.31 | 35 |
| MOL013287 | Physovenine | 106.21 | 0.19 | 35 |
| MOL002565 | Medicarpin | 49.22 | 0.34 | 33 |

**Table S3 Topological analysis indexes of 69 core targets**

| **Gene name** | **Degree**  **Centrality** | **Closeness**  **Centrality** | **Betweenness**  **Centrality** |
| --- | --- | --- | --- |
| IL6 | 62 | 0.91891892 | 0.0439039 |
| TP53 | 60 | 0.89473684 | 0.03267839 |
| AKT1 | 59 | 0.88311688 | 0.02706422 |
| PTGS2 | 59 | 0.88311688 | 0.02656263 |
| VEGFA | 58 | 0.87179487 | 0.0198743 |
| TNF | 57 | 0.86075949 | 0.02327491 |
| CXCL8 | 57 | 0.86075949 | 0.02039868 |
| CASP3 | 55 | 0.83950617 | 0.01450742 |
| STAT3 | 54 | 0.82926829 | 0.0193663 |
| IL10 | 52 | 0.80952381 | 0.00824406 |
| EGF | 50 | 0.79069767 | 0.00968737 |
| CCL2 | 50 | 0.79069767 | 0.00974135 |
| IL1B | 49 | 0.7816092 | 0.02115139 |
| IL4 | 49 | 0.7816092 | 0.02408178 |
| MMP9 | 49 | 0.7816092 | 0.00591198 |
| MYC | 48 | 0.77272727 | 0.01030294 |
| CCND1 | 45 | 0.74725275 | 0.00922023 |
| EGFR | 45 | 0.74725275 | 0.00743955 |
| ICAM1 | 45 | 0.74725275 | 0.00376912 |
| PPARG | 45 | 0.74725275 | 0.00645463 |
| MMP2 | 45 | 0.74725275 | 0.00692719 |
| IL2 | 45 | 0.74725275 | 0.00533972 |
| HMOX1 | 44 | 0.73913043 | 0.01701682 |
| CAT | 44 | 0.73913043 | 0.0237887 |
| RELA | 43 | 0.7311828 | 0.00514563 |
| VCAM1 | 42 | 0.72340426 | 0.00287768 |
| IFNG | 42 | 0.72340426 | 0.00230054 |
| STAT1 | 41 | 0.71578947 | 0.00809359 |
| SERPINE1 | 40 | 0.70833333 | 0.00247391 |
| TGFB1 | 39 | 0.70103093 | 0.00194741 |
| PTEN | 38 | 0.69387755 | 0.00523866 |
| MPO | 37 | 0.68686869 | 0.00626716 |
| HIF1A | 36 | 0.67326733 | 0.00228039 |
| CXCL10 | 36 | 0.68771235 | 0.00133945 |
| SPP1 | 36 | 0.68193321 | 0.00192507 |
| CRP | 36 | 0.68453217 | 0.00329075 |
| ERBB2 | 35 | 0.67326733 | 0.00259387 |
| MMP1 | 35 | 0.67326733 | 9.58E-04 |
| FASLG | 35 | 0.67326733 | 0.00306656 |
| NOS2 | 34 | 0.66666667 | 0.00286174 |
| NFKBIA | 33 | 0.65384615 | 0.00189024 |
| MMP3 | 33 | 0.66019417 | 6.98E-04 |
| SELE | 33 | 0.66019417 | 0.0010715 |
| CD40LG | 31 | 0.64761905 | 0.00112203 |
| CDKN1A | 30 | 0.62962963 | 0.00198537 |
| IL1A | 30 | 0.64150943 | 0.00138528 |
| NR3C1 | 30 | 0.64150943 | 0.00368993 |
| CDKN2A | 29 | 0.62962963 | 8.71E-04 |
| NFE2L2 | 28 | 0.62962963 | 0.00594959 |
| IRF1 | 27 | 0.62385321 | 4.87E-04 |
| F2 | 26 | 0.61818182 | 0.00556557 |
| IKBKB | 24 | 0.60176991 | 7.17E-04 |
| CDK4 | 20 | 0.58119658 | 2.69E-04 |
| CYP19A1 | 20 | 0.5862069 | 0.00605225 |
| ALOX5 | 20 | 0.5862069 | 2.89E-04 |
| ABCG2 | 20 | 0.5862069 | 0.00637093 |
| CHUK | 16 | 0.56198347 | 2.20E-04 |
| CYP3A4 | 16 | 0.56666667 | 0.00613427 |
| CYP1A1 | 16 | 0.56666667 | 0.00552308 |
| PTGS1 | 14 | 0.55737705 | 4.62E-05 |
| CYP1B1 | 13 | 0.55284553 | 0.00322221 |
| BAX | 12 | 0.53968254 | 6.42E-05 |
| ODC1 | 11 | 0.53968254 | 3.10E-05 |
| NR1I2 | 10 | 0.53968254 | 0.00109292 |
| AKR1C1 | 8 | 0.53125 | 0.00118894 |
| ABCC2 | 7 | 0.5037037 | 0.00158551 |
| DUOX2 | 7 | 0.51908397 | 1.51E-05 |
| HSD3B1 | 6 | 0.49275362 | 4.19E-04 |
| XDH | 5 | 0.51515152 | 5.77E-04 |
